# Supplementary material
Source: PubMed Central journal article supplement (PMC8020332)

**Extended Data Figure 1B**

**Liver KHK-C**

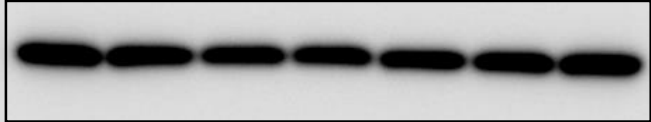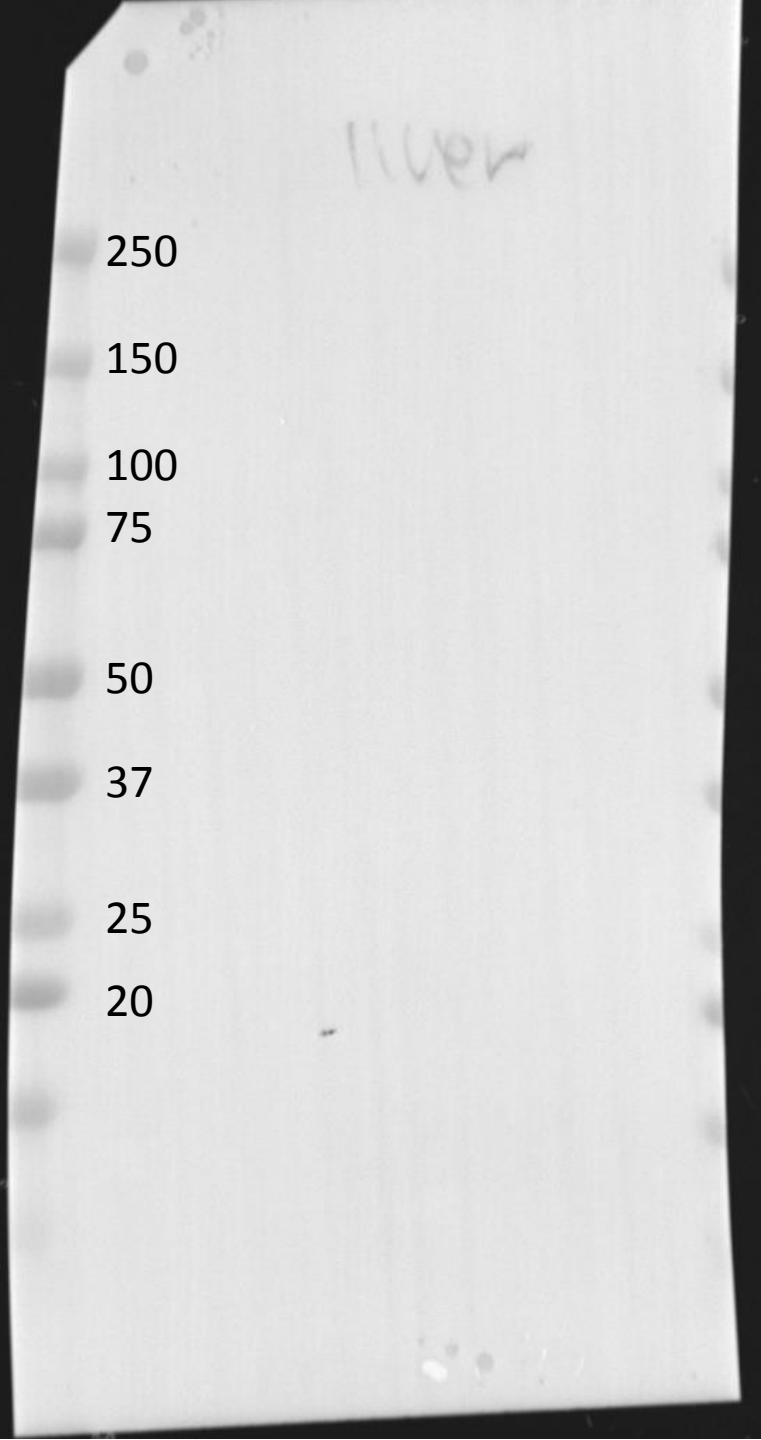

**Extended Data Figure 1B**

**Liver total KHK**

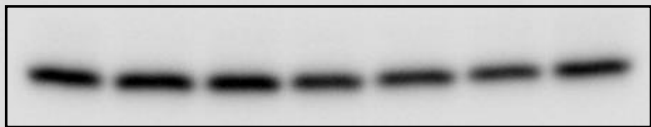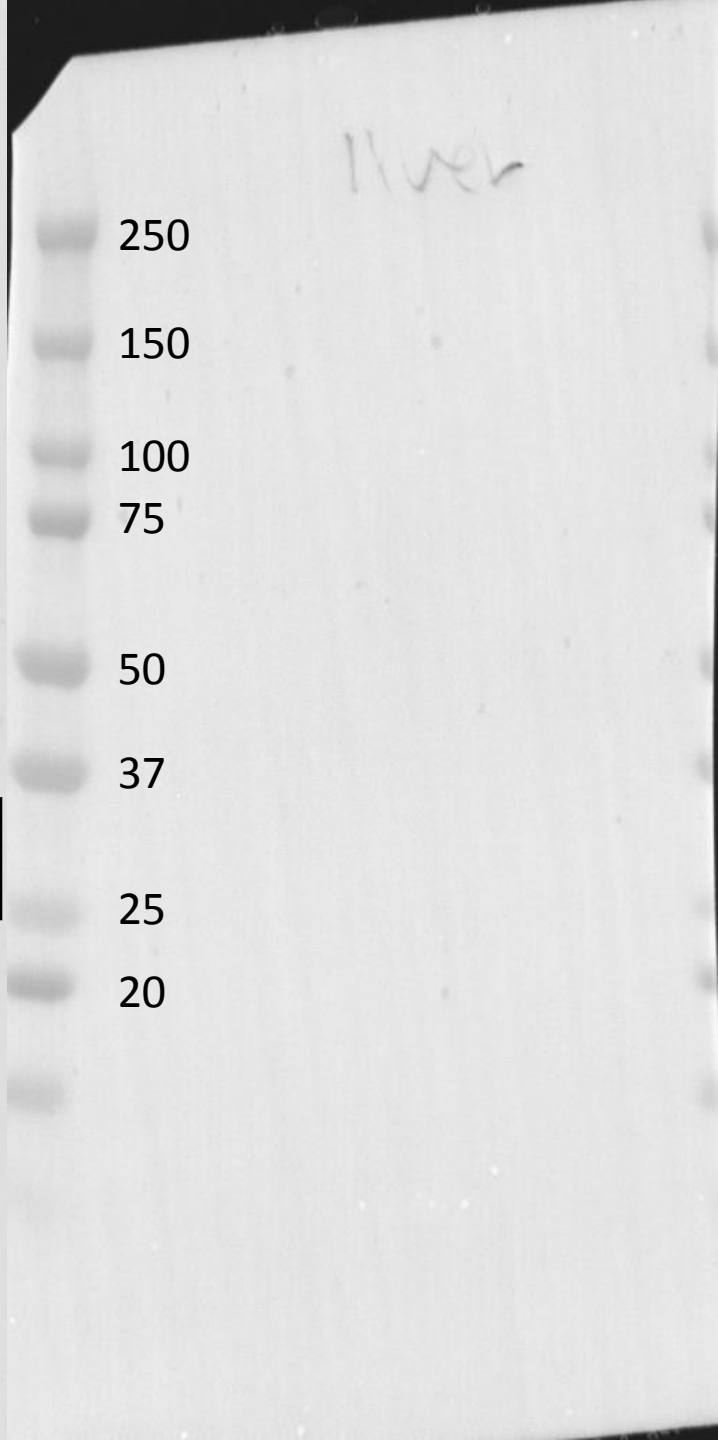

Extended Data Figure 1B

Liver  $\beta$ -ACTIN

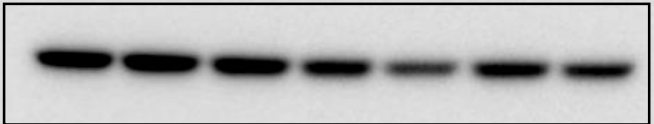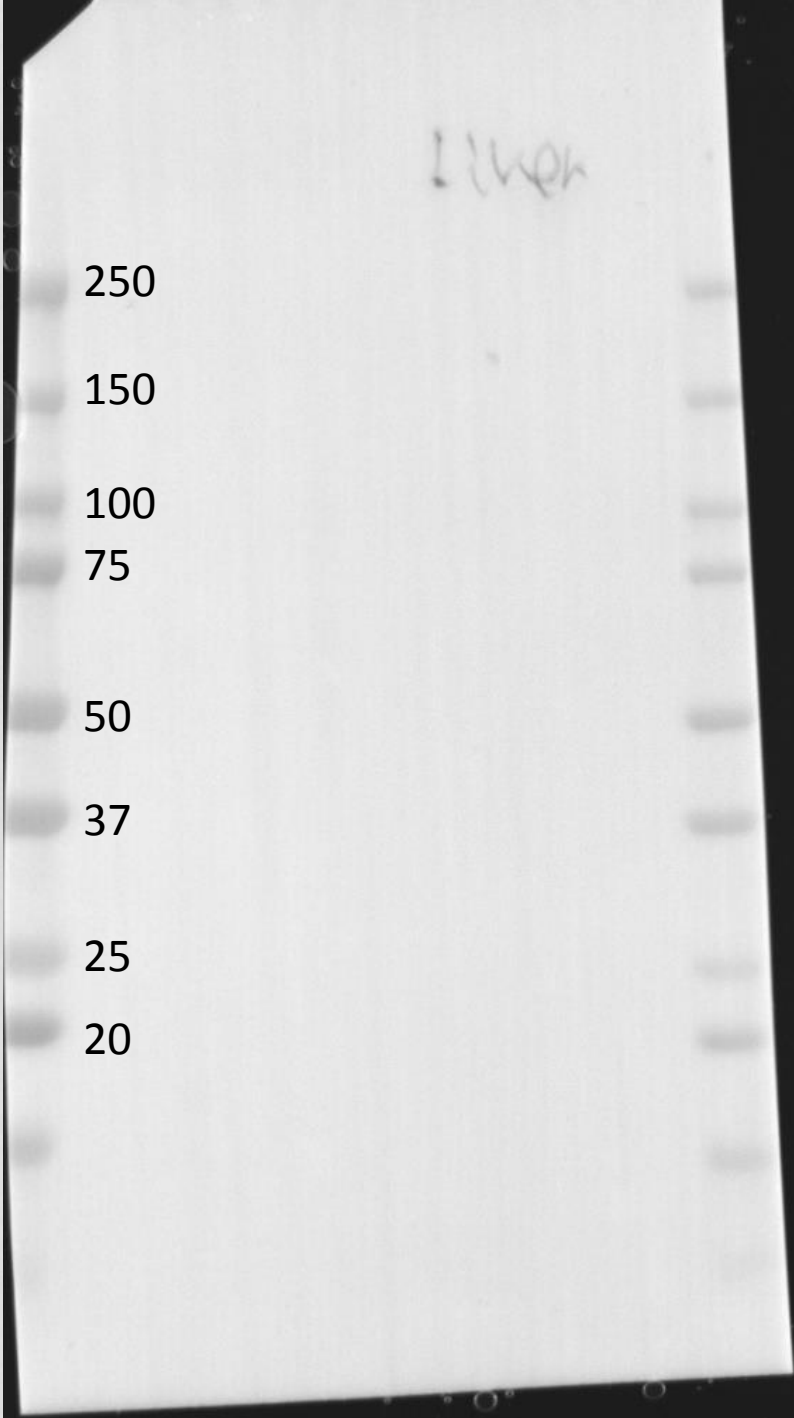

**Extended Data Figure 1B**

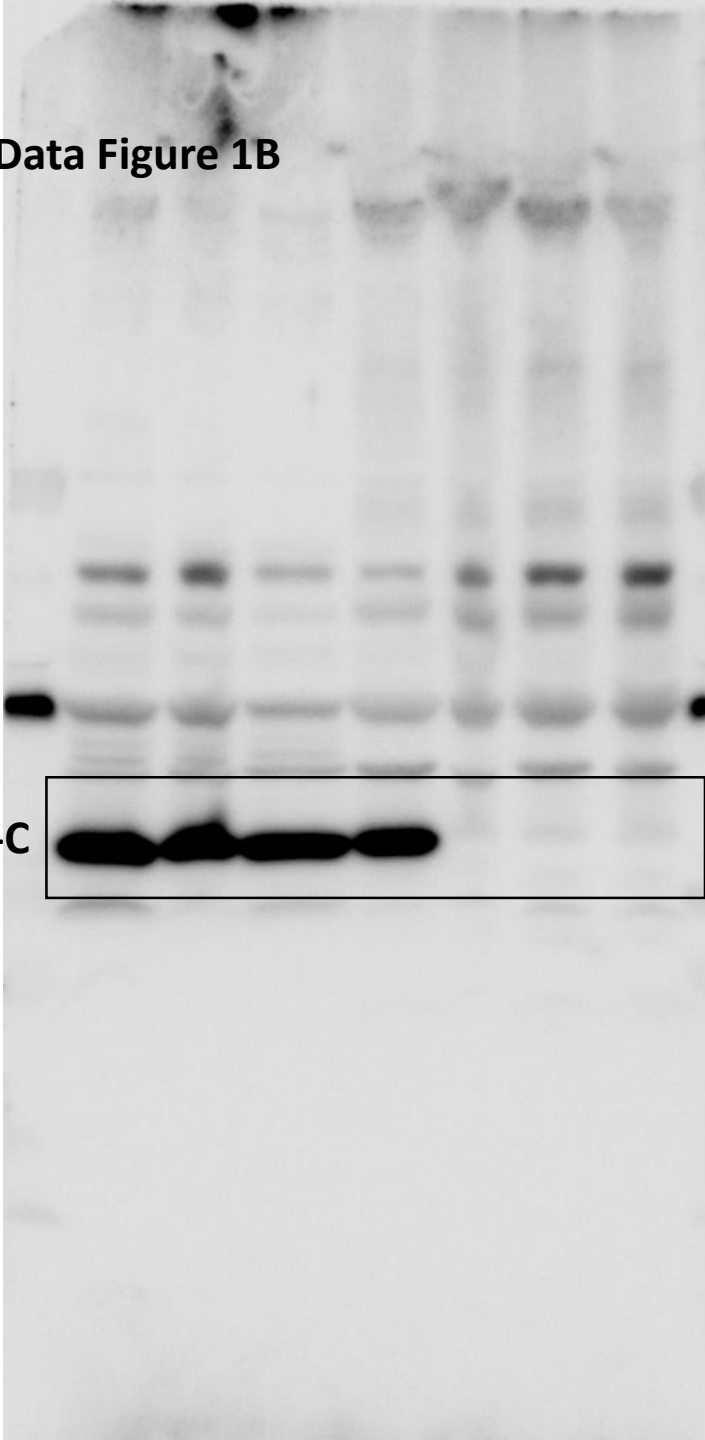

*Jejun*

250

150

100

75

50

37

25

20

**Jejunum KHK-C**

**Extended Data Figure 1B**

**Jejunum  
total KHK**

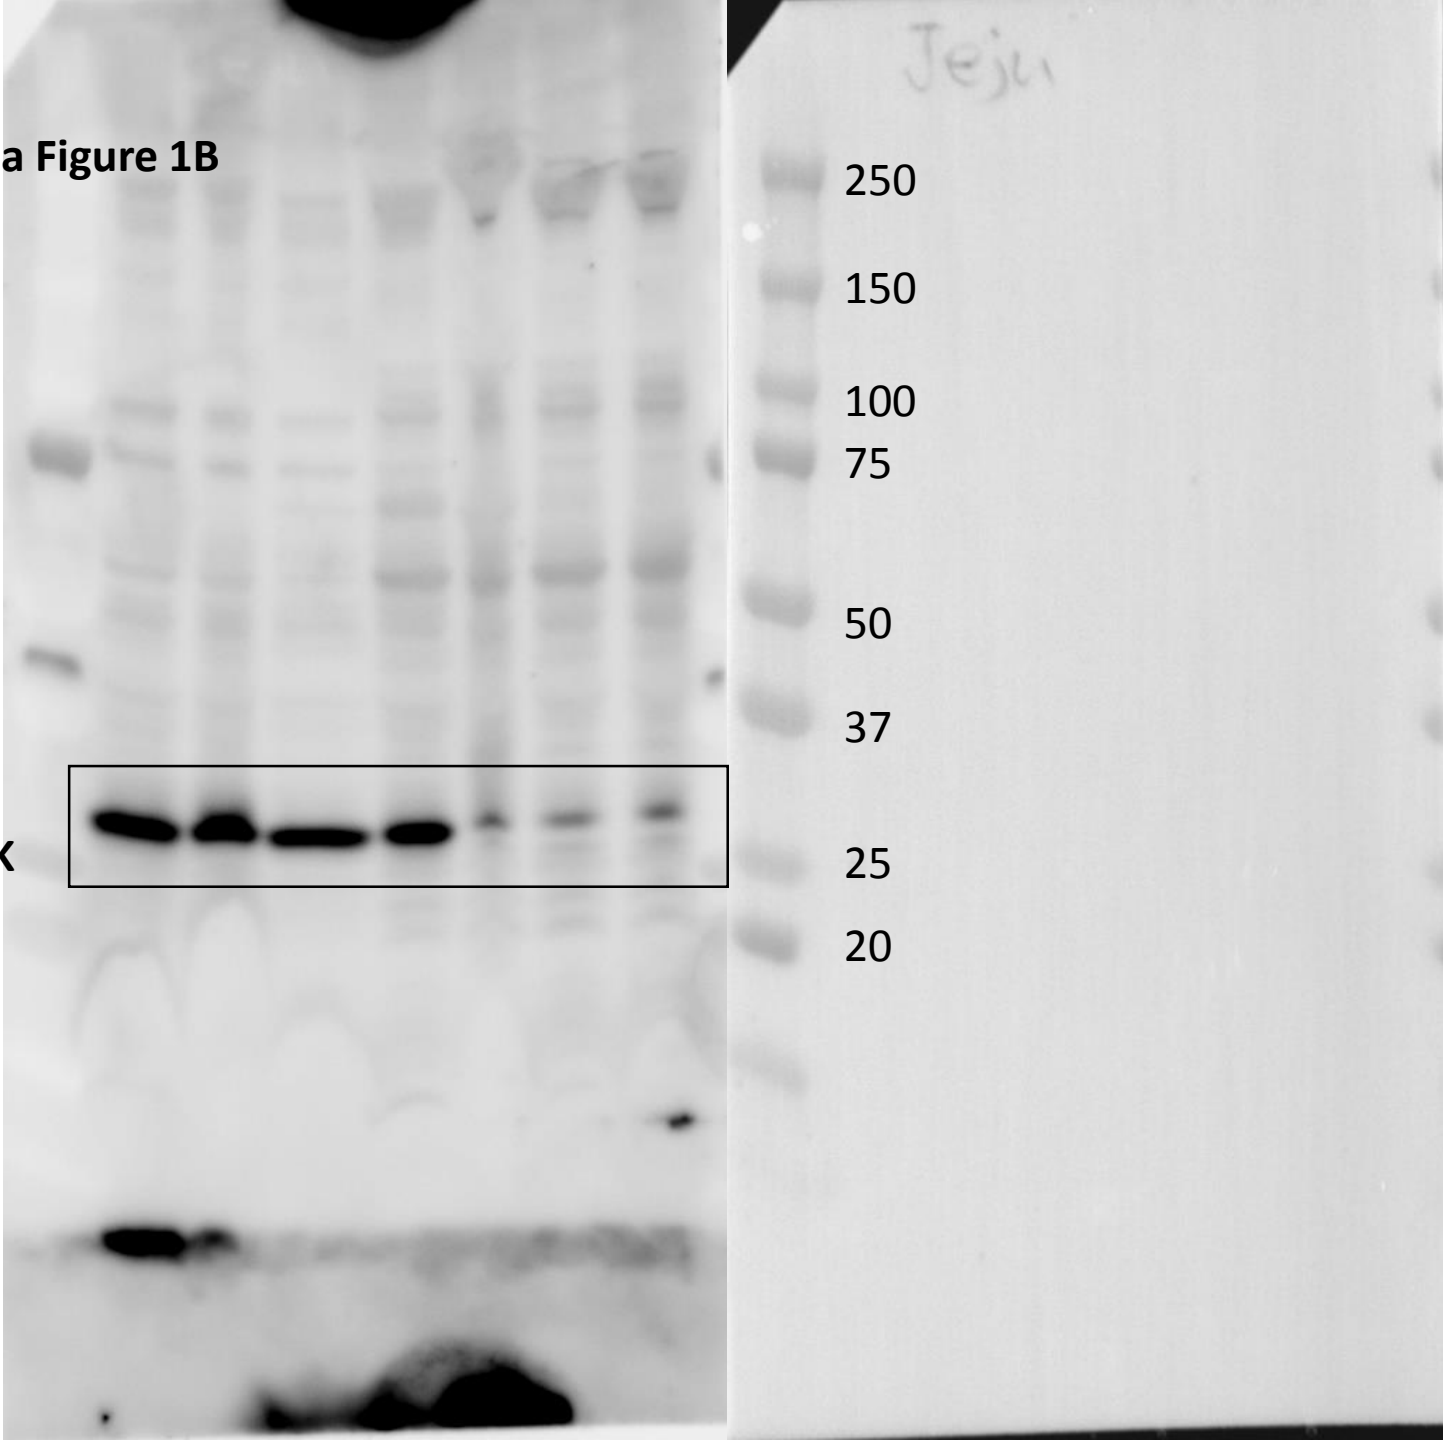

Extended Data Figure 1B

Jejunum  
 $\beta$ -ACTIN

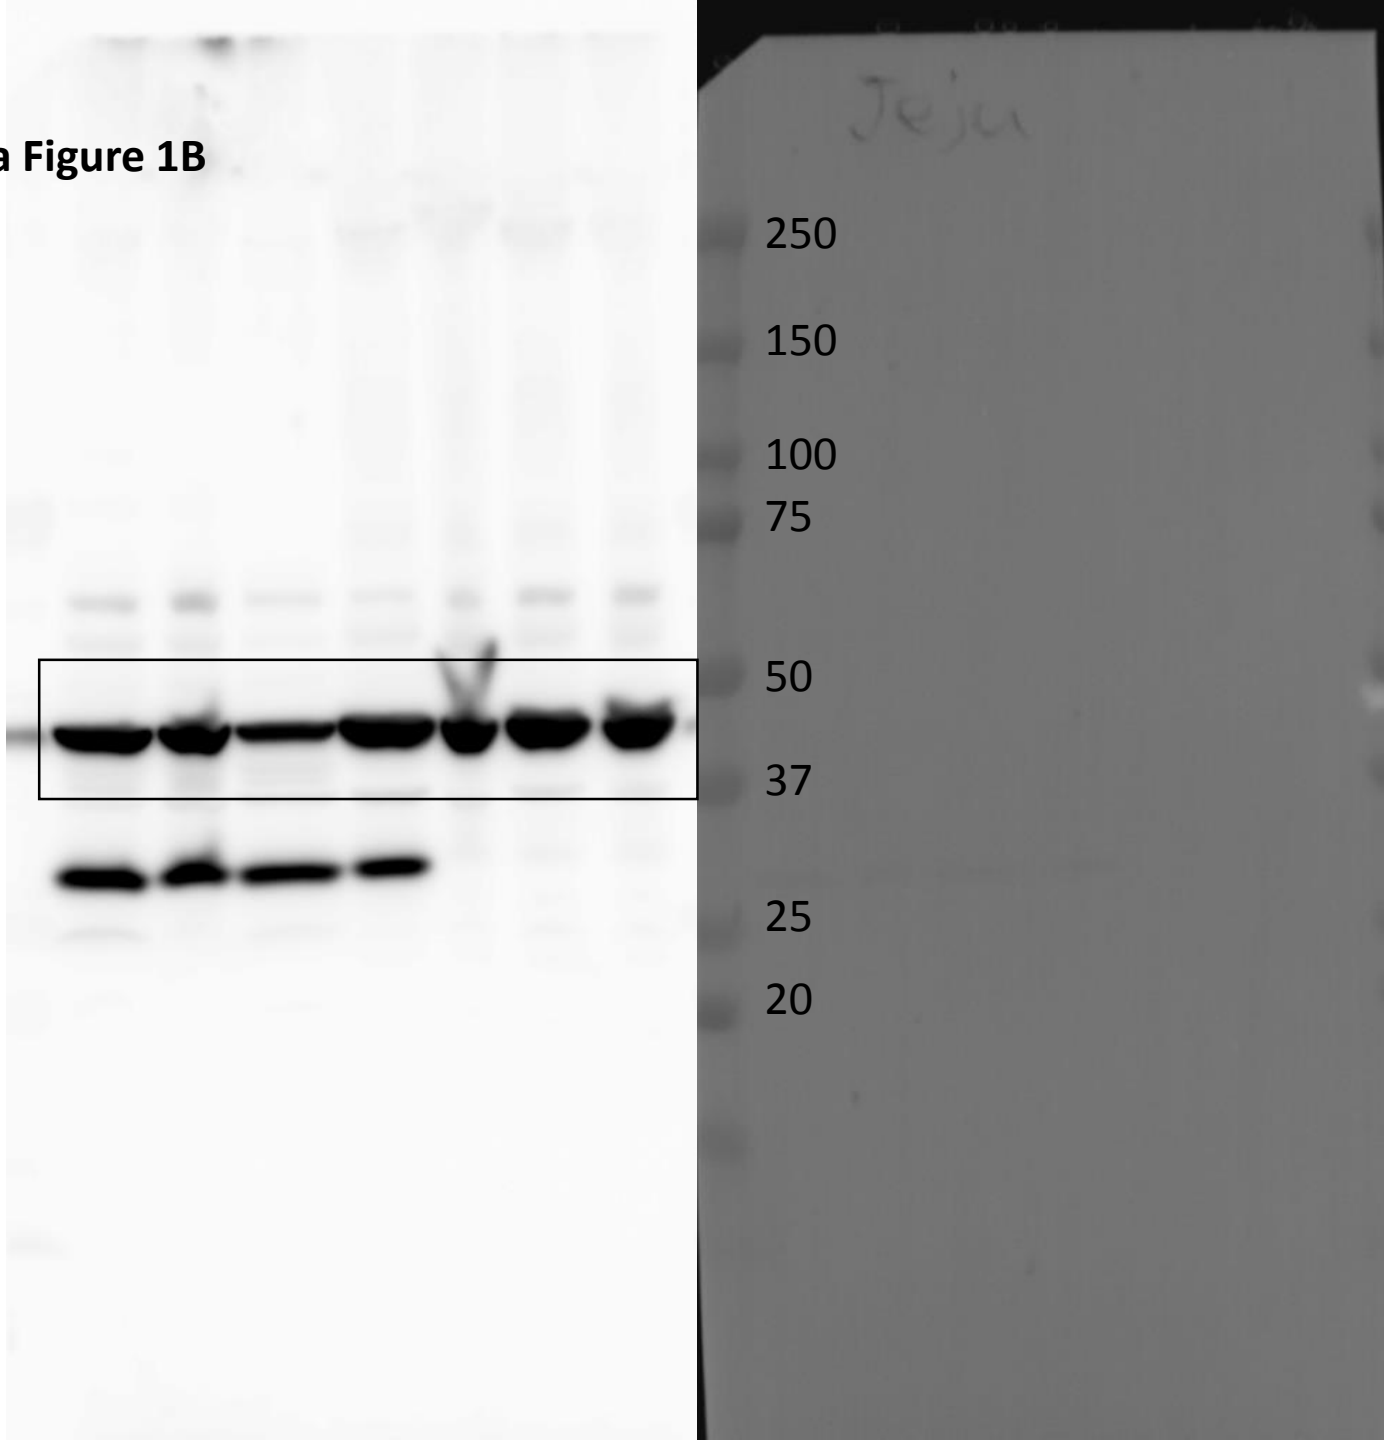

Supplement: NIHMS1678130-supplement-extended_data_1.pdf [file NIHMS1678130-supplement-extended_data_1.pdf]
