# Supplementary material
Source: PubMed Central journal article supplement (PMC8020332)
Supplement: NIHMS1678130-supplement-extended_data_2.pdf [file NIHMS1678130-supplement-extended_data_2.pdf]

Extended Data Figure 7B

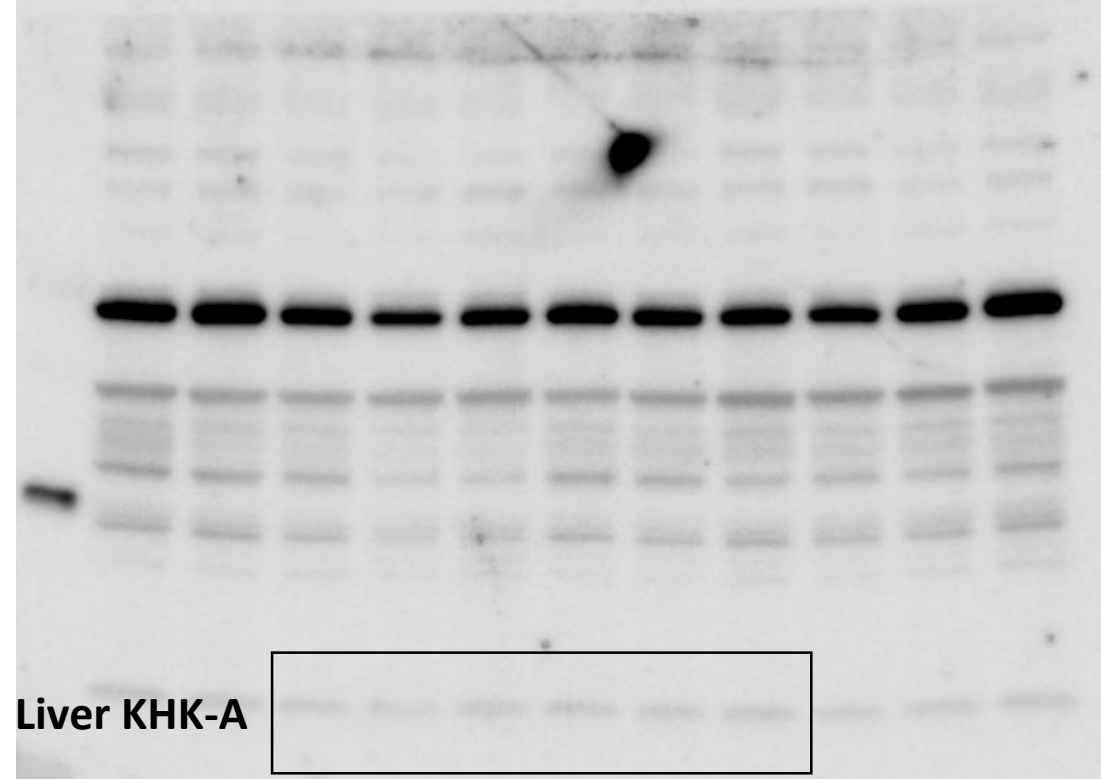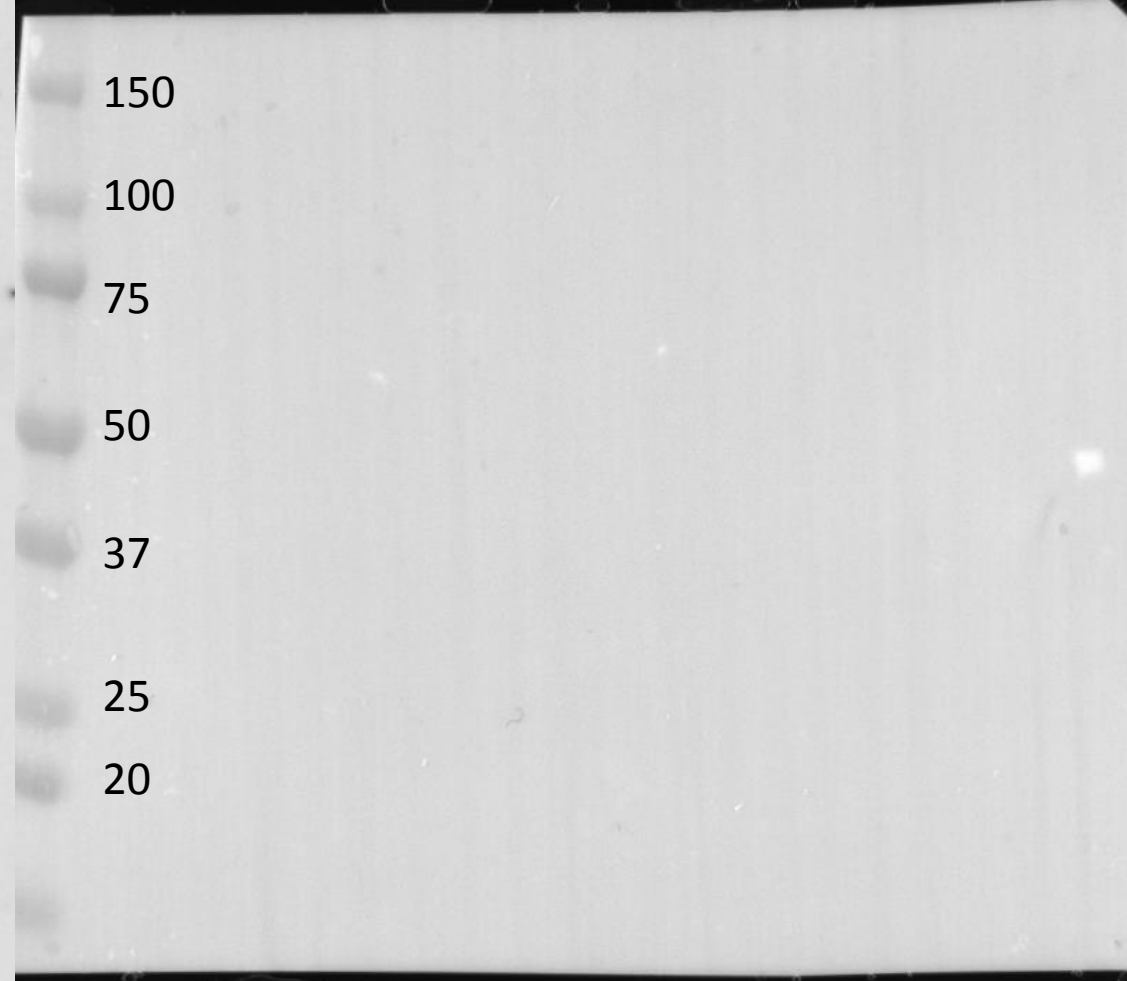

Extended Data Figure 7B

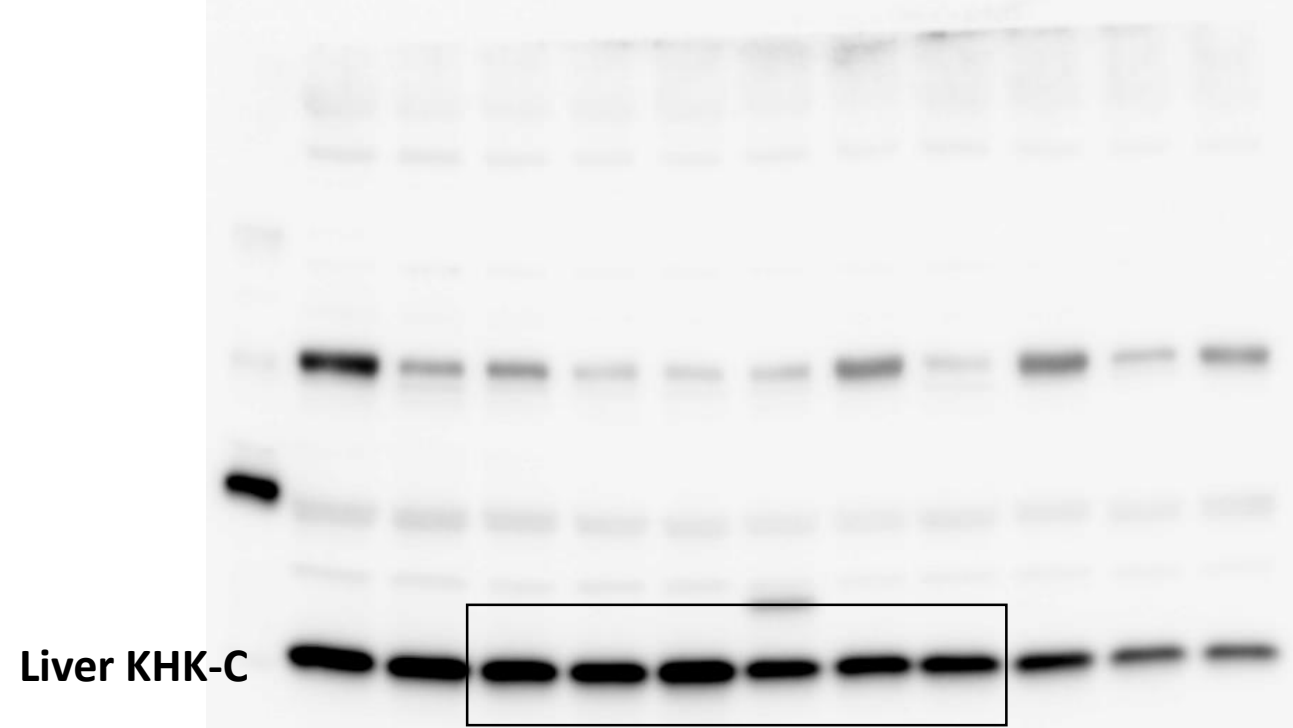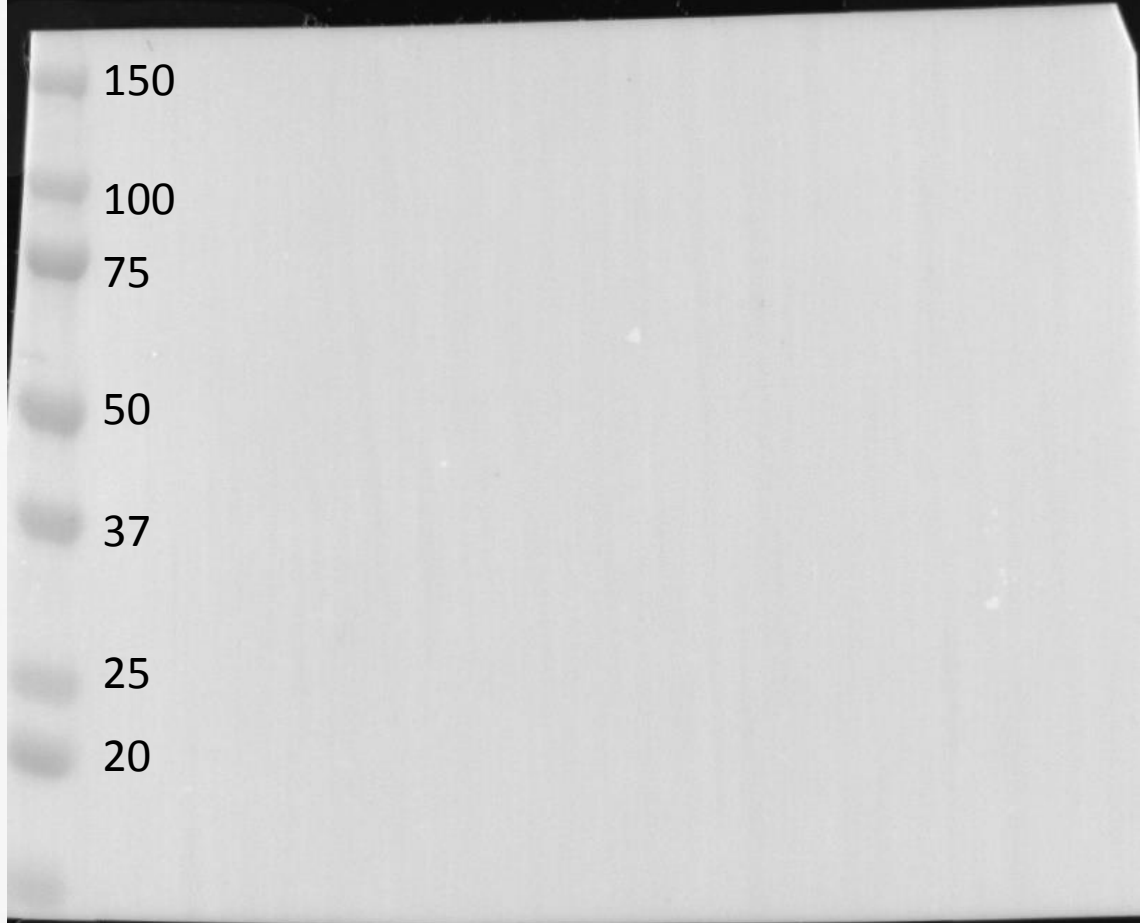

Extended Data Figure 7B

Liver  
 $\beta$ -ACTIN

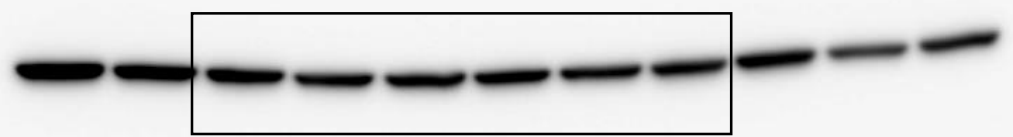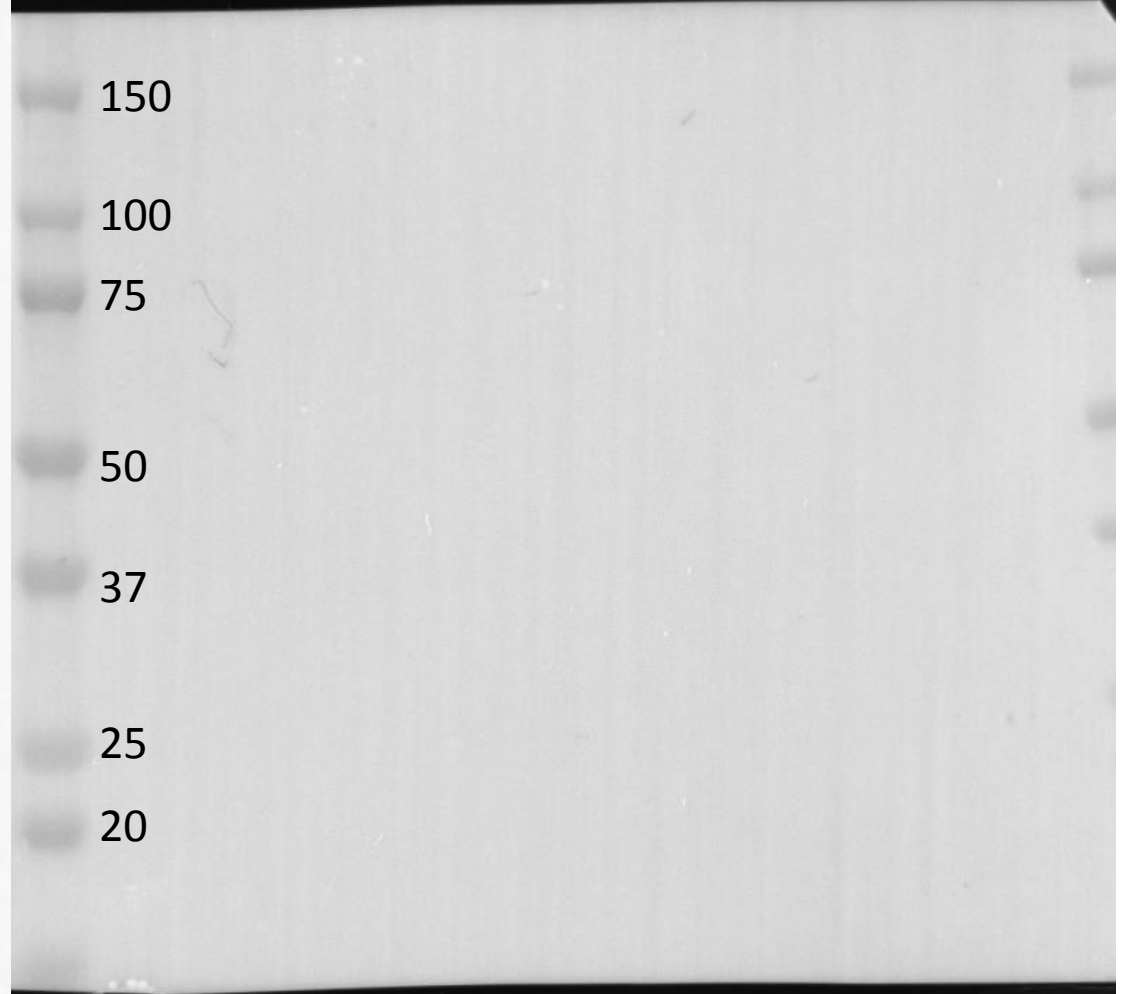

**Extended Data Figure 7B**

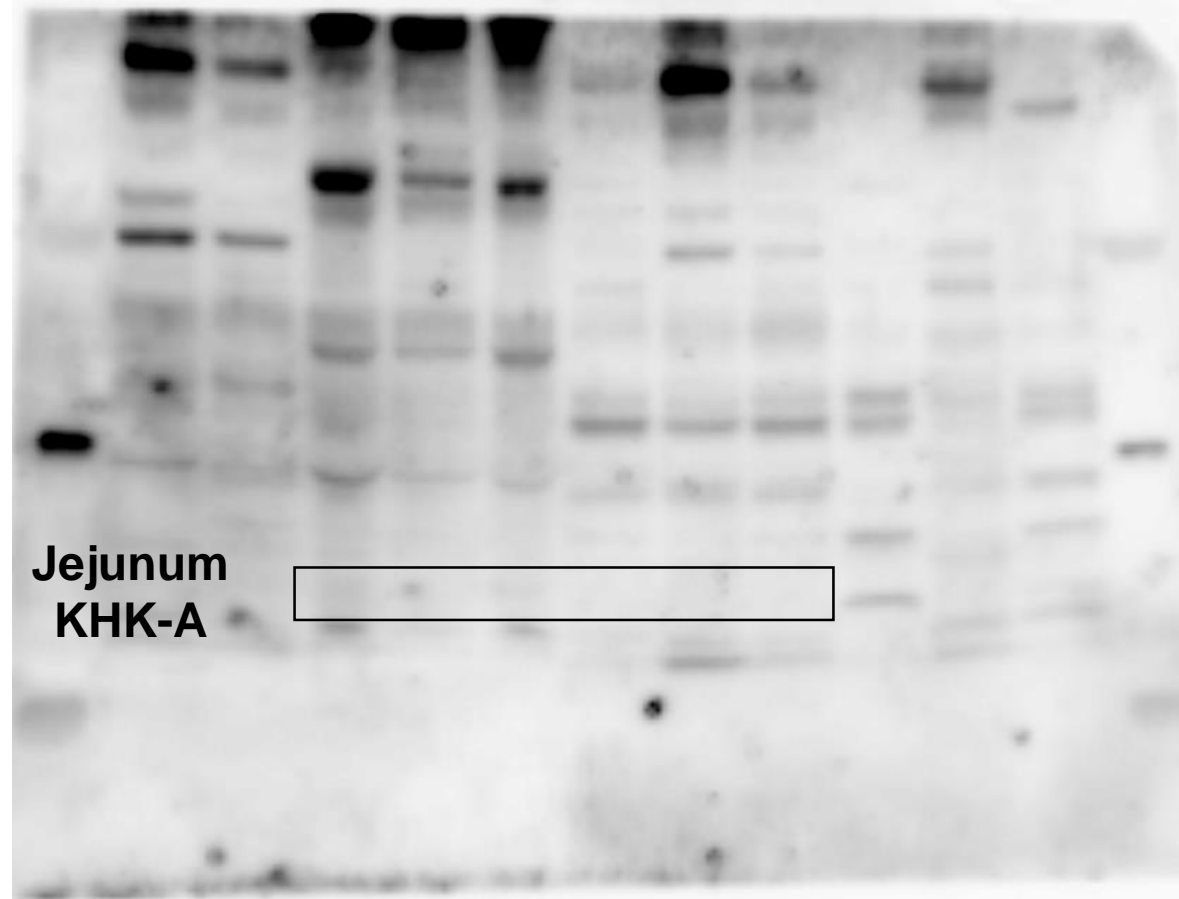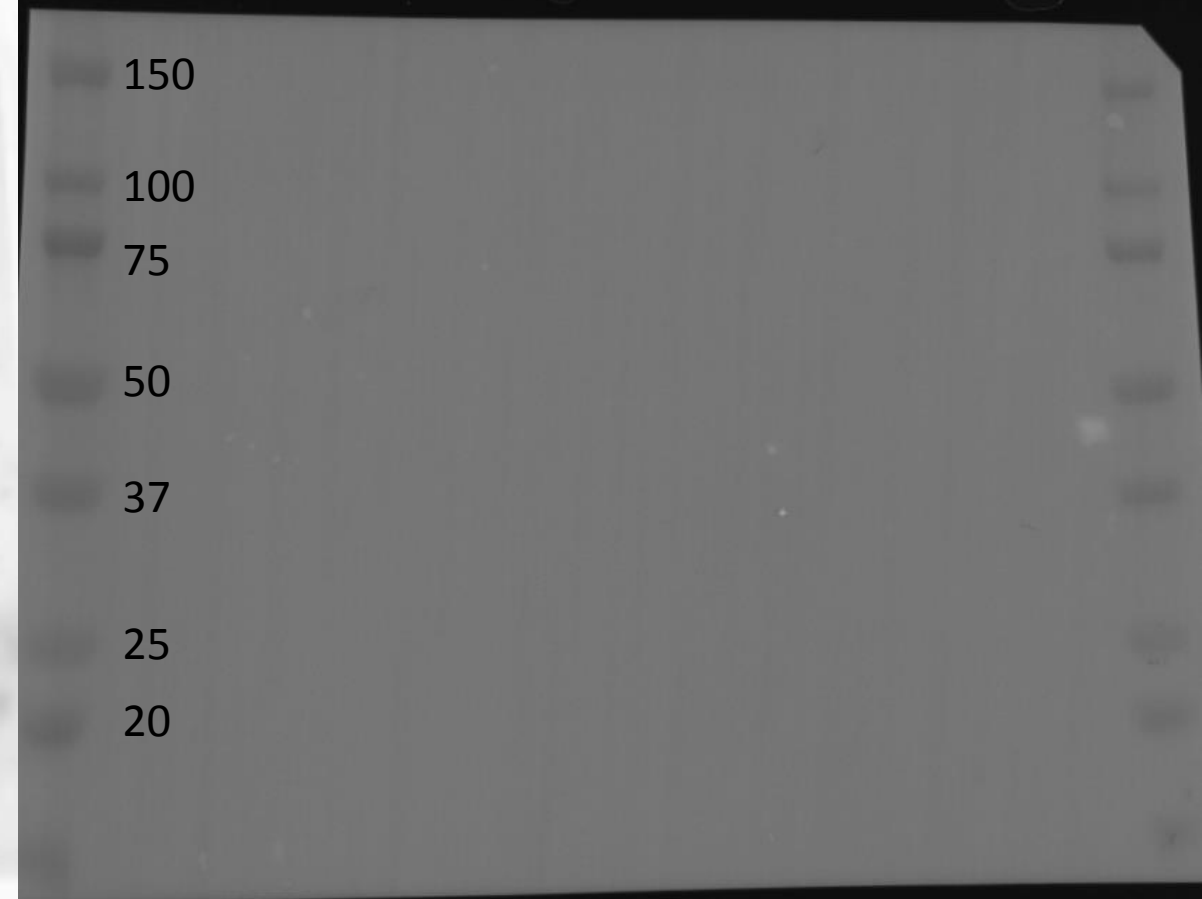

Extended Data Figure 7B

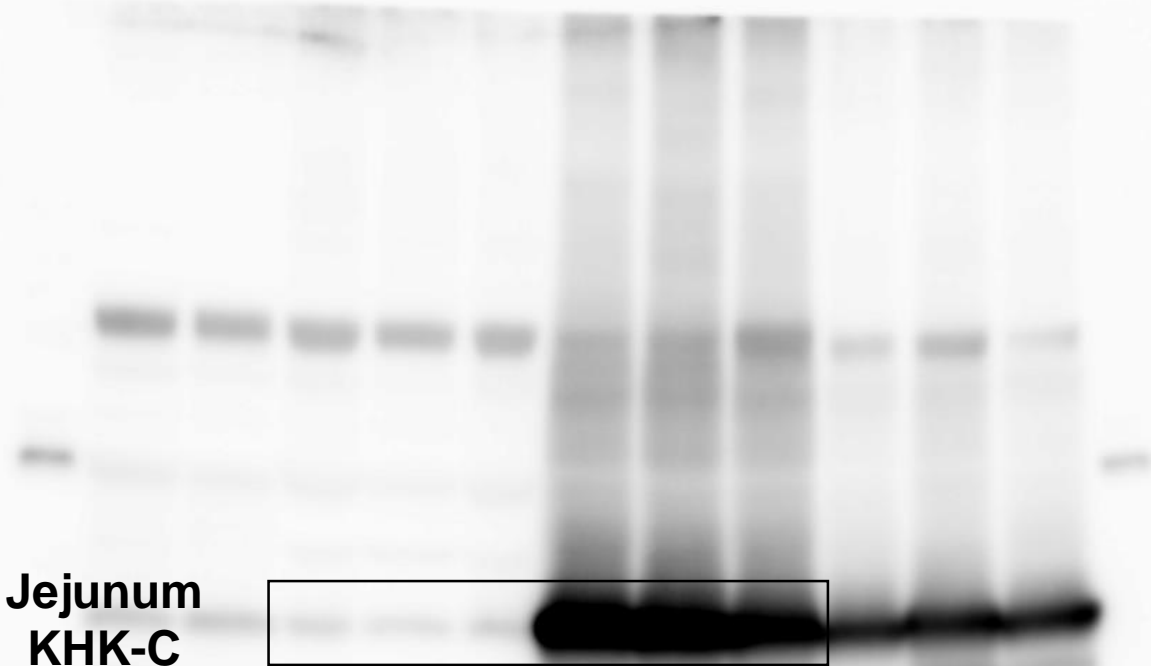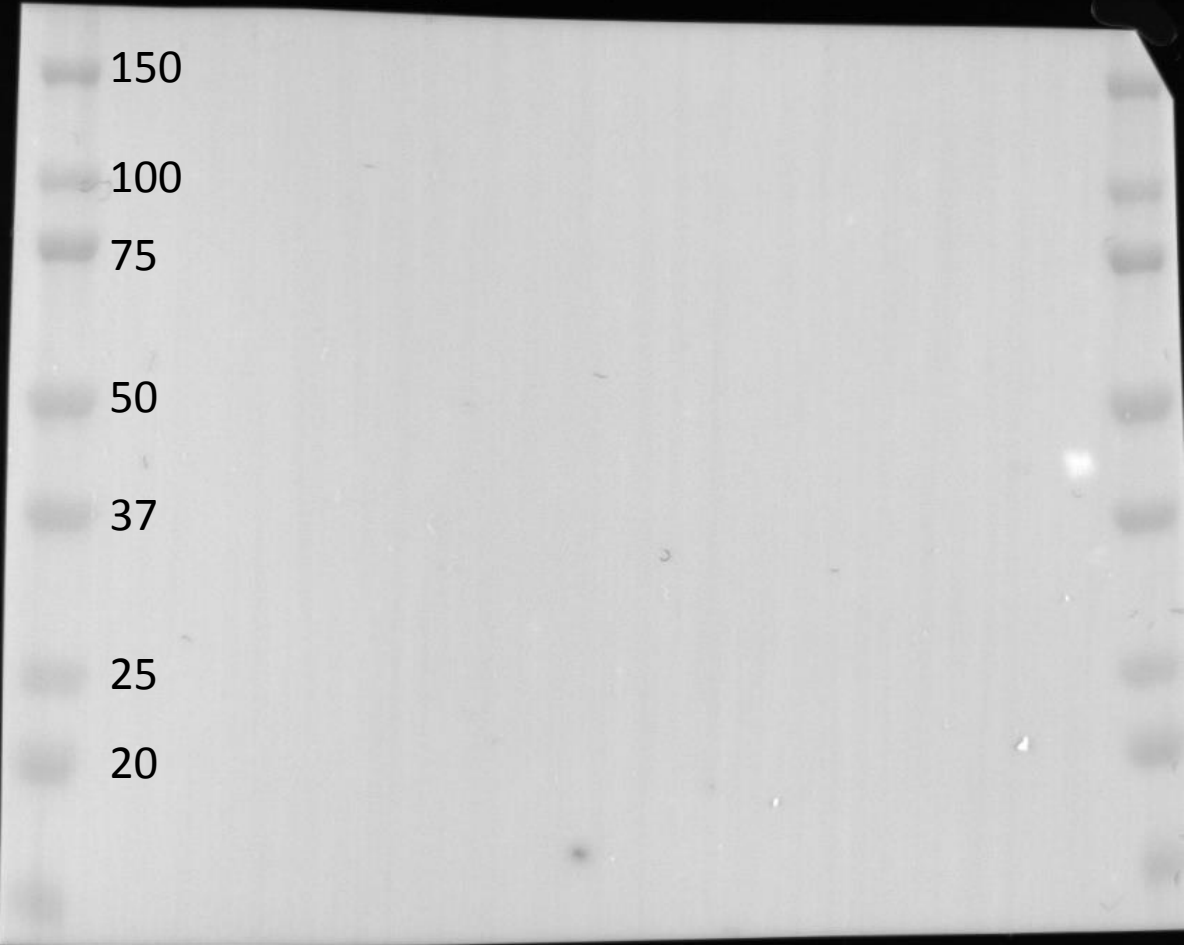

Extended Data Figure 7B

Jejunum  
 $\beta$ -ACTIN

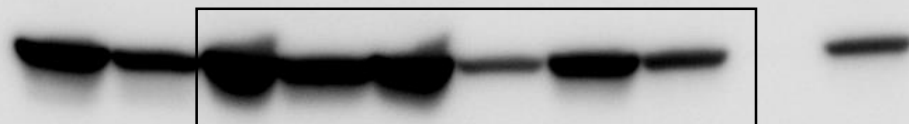

150

100

75

50

37

25

20
