# Supplementary material
Source: PubMed Central journal article supplement (PMC8020332)
Supplement: NIHMS1678130-supplement-suppl__figure.pdf [file NIHMS1678130-supplement-suppl__figure.pdf]

In the format provided by the authors and unedited.

# The small intestine shields the liver from fructose-induced steatosis

Cholsoon Jang<sup>1,4,5</sup>  , Shogo Wada<sup>2,5</sup>, Steven Yang<sup>2</sup>, Bridget Gosis<sup>2</sup>, Xianfeng Zeng<sup>1</sup>, Zhaoyue Zhang<sup>1</sup>, Yihui Shen<sup>1</sup>, Gina Lee<sup>3</sup> , Zoltan Arany<sup>2</sup>   and Joshua D. Rabinowitz<sup>1</sup>  

---

<sup>1</sup>Department of Chemistry and Lewis-Sigler Institute for Integrative Genomics, Princeton University, Princeton, NJ, USA. <sup>2</sup>Perelman School of Medicine, University of Pennsylvania, Philadelphia, PA, USA. <sup>3</sup>Meyer Cancer Center and Department of Pharmacology, Weill Cornell Medicine, New York, NY, USA. <sup>4</sup>Present address: Department of Biological Chemistry, University of California, Irvine, Irvine, CA, USA. <sup>5</sup>These authors contributed equally: Cholsoon Jang, Shogo Wada. e-mail: [choljang@uci.edu](mailto:choljang@uci.edu); [zarany@mail.med.upenn.edu](mailto:zarany@mail.med.upenn.edu); [joshr@princeton.edu](mailto:joshr@princeton.edu)

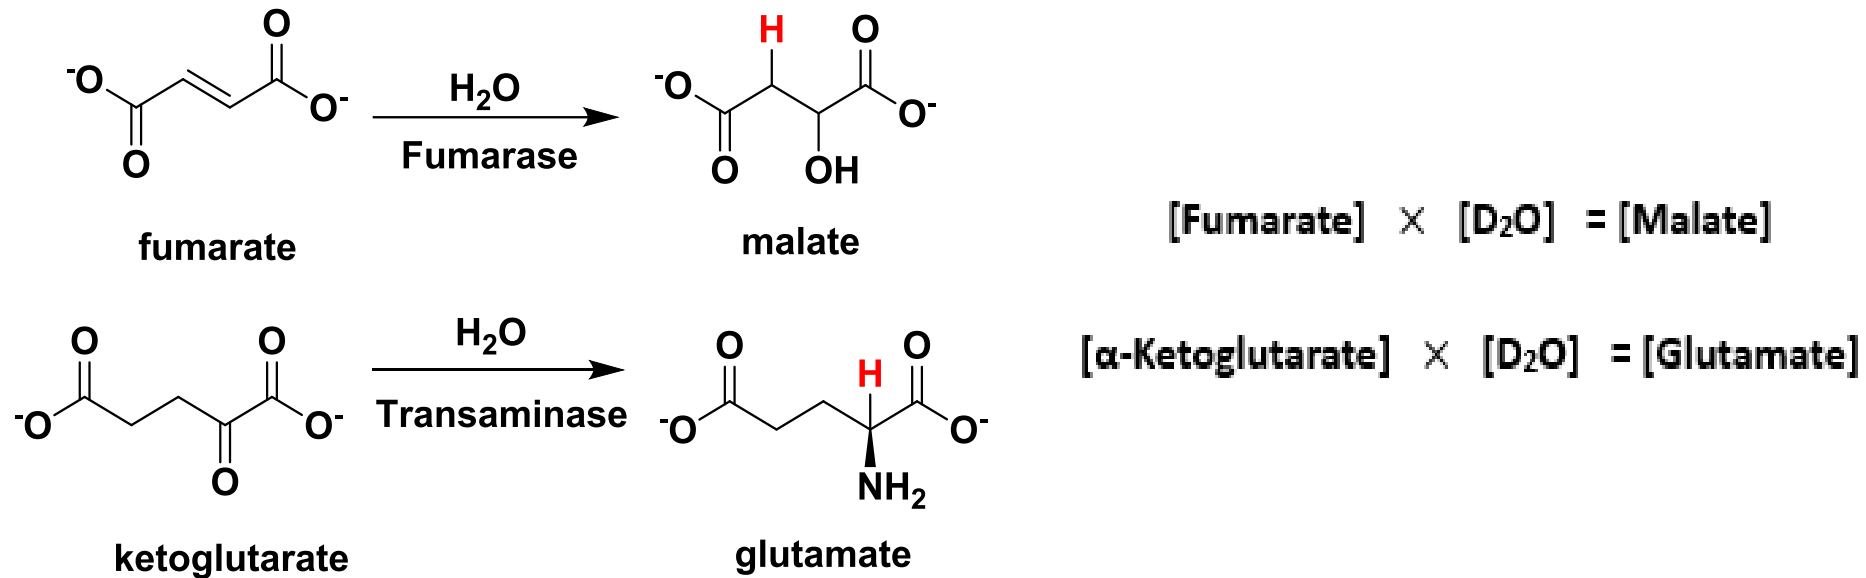

**Supplementary Figure.** After D<sub>2</sub>O administration into mice, circulating water fractional deuterium enrichment was determined based on labeling of soluble metabolites pairs (malate-fumarate; glutamate-ketoglutarate).
